# Supplementary material for: The reaction mechanism of polyalcohol dehydration in hot pressurized water
Source: Royal Society of Chemistry journal article supplement (doi:10.1039/c6cp05695d), 2016-01-01
Supplement: c6cp05695d3.pdf [file c6cp05695d3.pdf]

# Supporting information for:

## The Reaction Mechanism of Polyalcohol Dehydration in Hot Pressurized Water

Sergi Ruiz-Barragan,<sup>†,¶</sup> Jordi Ribas Ariño,<sup>‡</sup> and Motoyuki Shiga<sup>\*,†</sup>

<sup>†</sup>*CCSE, Japan Atomic Energy Agency, 178-4-4, Wakashiba, Kashiwa, Chiba, 277-0871, Japan*

<sup>‡</sup>*Departament de Química-Física i CERQT, Universitat de Barcelona, Diagonal, 645, 08028-Barcelona,  
Spain*

<sup>¶</sup>*Department of Theoretical and Computational Molecular Science, Institute for Molecular Science,  
Myodaiji, Okazaki, Aichi 444-8585, Japan*

E-mail: shiga.motoyuki@jaea.go.jp

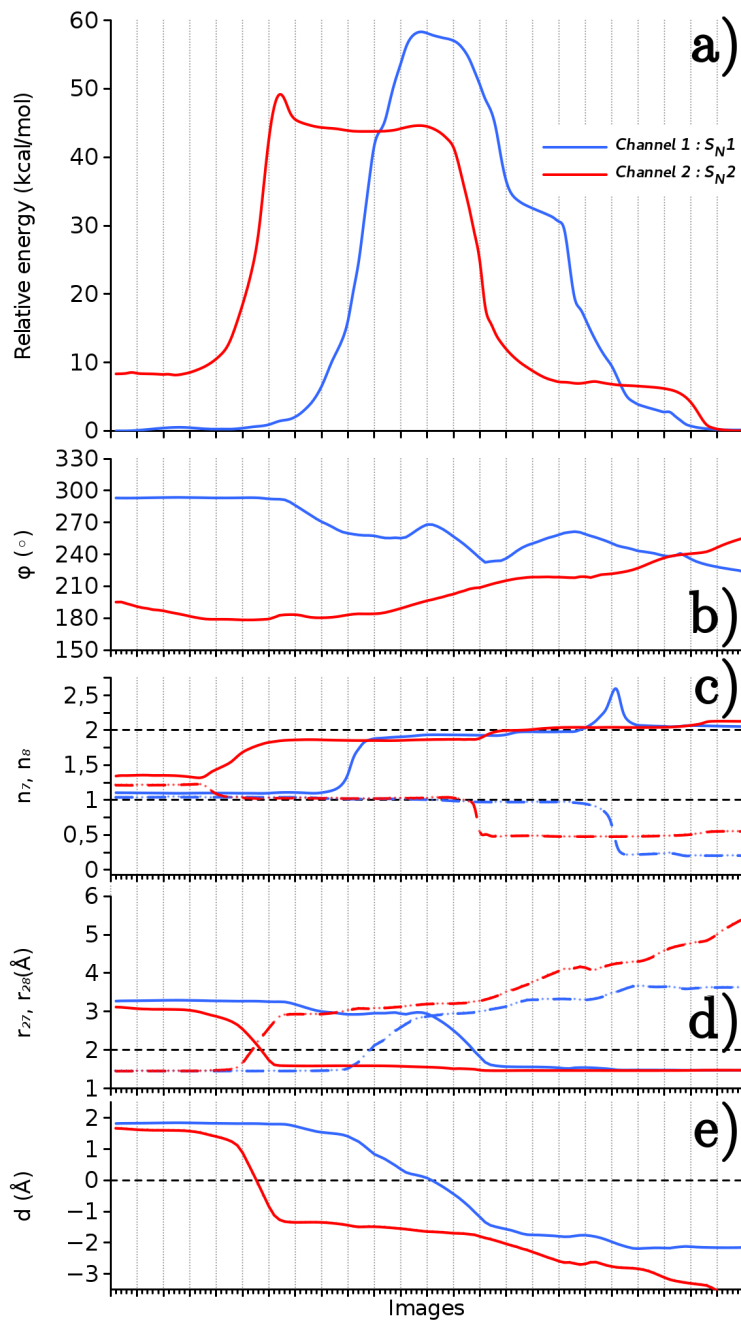

Figure S1: The change along the  $\text{HDO}(\text{H}_2\text{O})_4\text{H}^+$  minimum energy paths, Channels 1 (blue) and 2 (red), obtained from the PBE/SV(P) calculations. (a) The relative energy, and the structural variables (b)  $\phi$ , (c)  $n_7$  (solid line) and  $n_8$  (dashed line), (d)  $r_{27}$  (dashed line) and  $r_{28}$  (solid line), and (e)  $d$ . The barriers of the  $\text{S}_{\text{N}}1$  channel (blue) and the  $\text{S}_{\text{N}}2$  channel (red) are 58 and 45 kcal/mol, respectively.

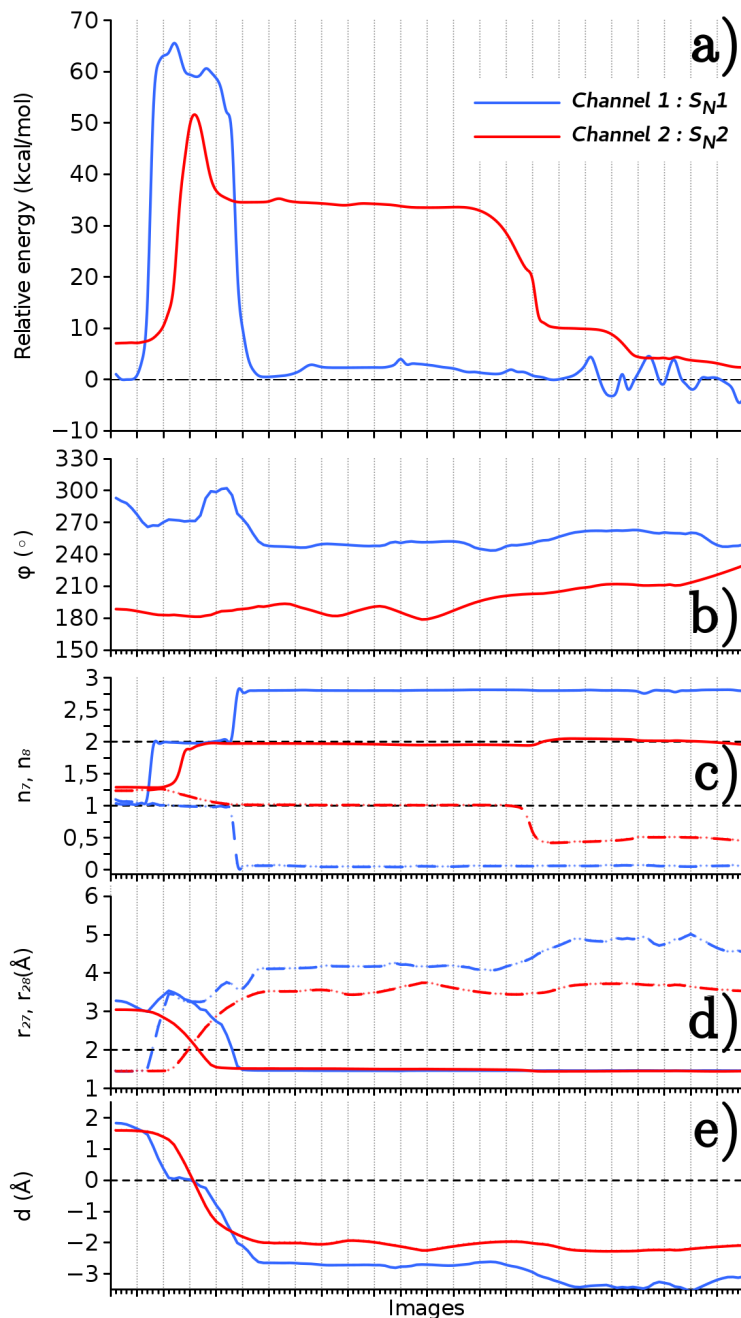

Figure S2: The change along the  $\text{HDO}(\text{H}_2\text{O})_6\text{H}^+$  minimum energy paths, Channels 1 (blue) and 2 (red), obtained from the RIMP2/SV(P) calculations. (a) The relative energy, and the structural variables (b)  $\phi$ , (c)  $n_7$  (solid line) and  $n_8$  (dashed line), (d)  $r_{27}$  (dashed line) and  $r_{28}$  (solid line), and (e)  $d$ . The barriers of the  $\text{S}_{\text{N}}1$  channel (blue) and the  $\text{S}_{\text{N}}2$  channel (red) are 66 and 41 kcal/mol, respectively.

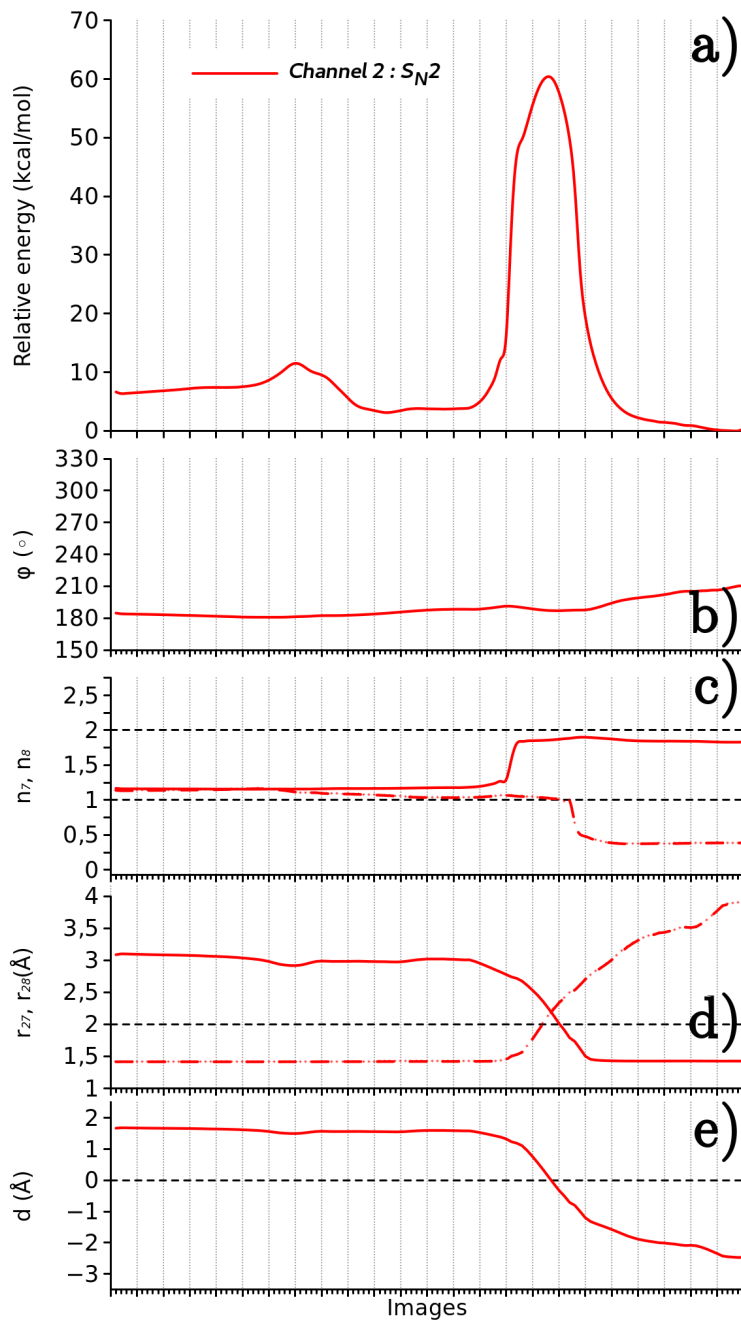

Figure S3: The change along the  $\text{HDO}(\text{H}_2\text{O})_6$  minimum energy path, Channels 2 (red), obtained from the PBE/SV(P) calculations. (a) The relative energy, and the structural variables (b)  $\phi$ , (c)  $n_7$  (solid line) and  $n_8$  (dashed line), (d)  $r_{27}$  (dashed line) and  $r_{28}$  (solid line), and (e)  $d$ . The barriers of the  $\text{S}_{\text{N}}2$  channel without and extra proton is 57 kcal/mol.

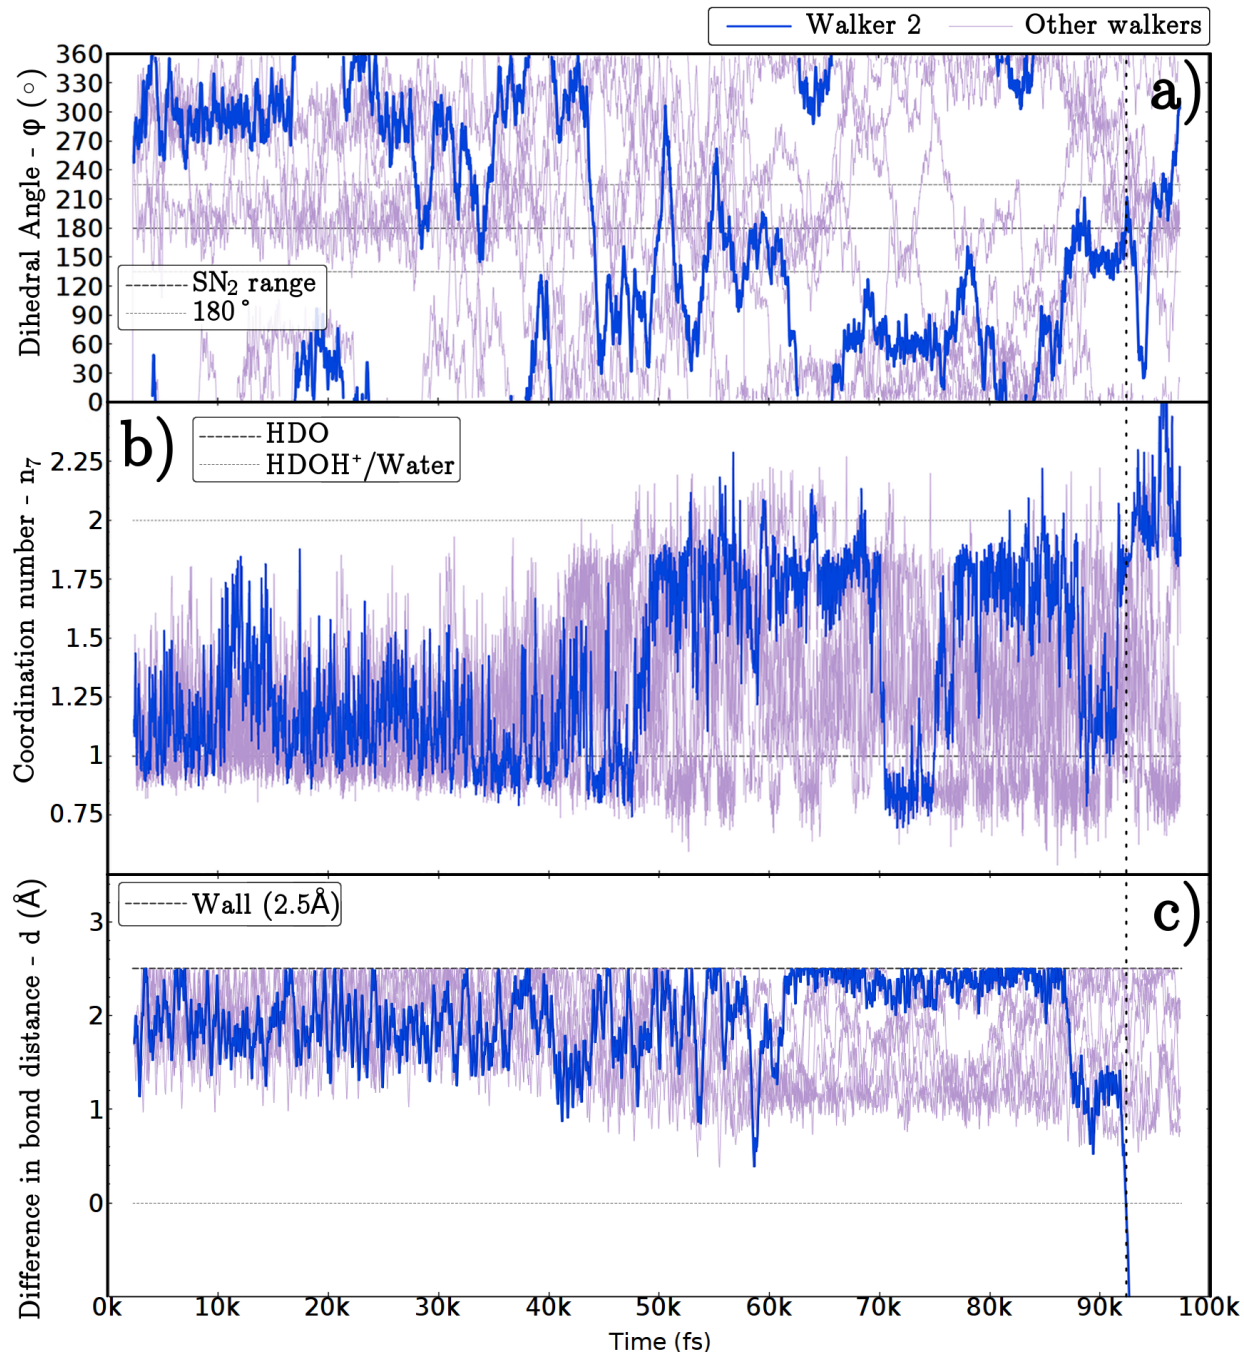

Figure S4: The evolution of three collective variables, (a)  $\phi$  (b),  $n_7$  and (c)  $d$ , of the respective walkers obtained from the PBE/PW metadynamics calculations of aqueous solution. All the walkers are shown in purple, except Walker 2 highlighted in blue which has first lead to the reaction. Walker 2 crossed the transition state at 92 ps marked by the dotted line. In (a), the region in which S<sub>N</sub>2 can occur (135°–225°) is marked by dashed lines. In (b), the values of neutral HDO ( $n_7 = 1$ ) and protonated HDO ( $n_7 = 2$ ) are marked by dashed lines. In (c), the restriction wall used in metadynamics at  $d = 2.5$  Å and the region of transition state  $d = 0.0$  Å are marked by dashed lines.

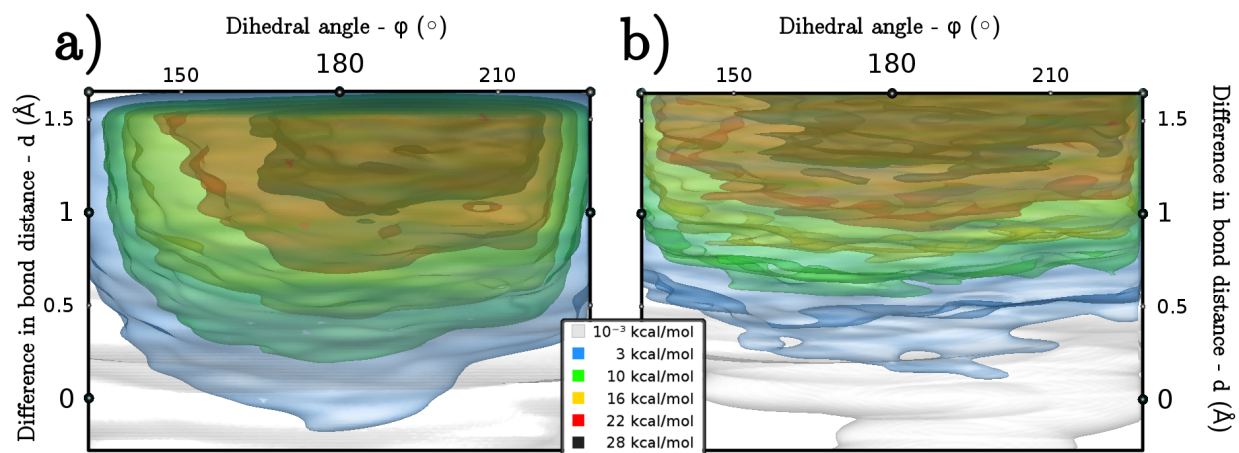

Figure S5: Three-dimensional free energy surface of (a)  $x = 4$  and (b)  $x = 6$  in the HDO microsolvated model with respect to  $d$ ,  $\phi$  and  $n_7$ , obtained from the PBE/SV(P) metadynamics calculations. The views are in a direction parallel to  $n_7$ .

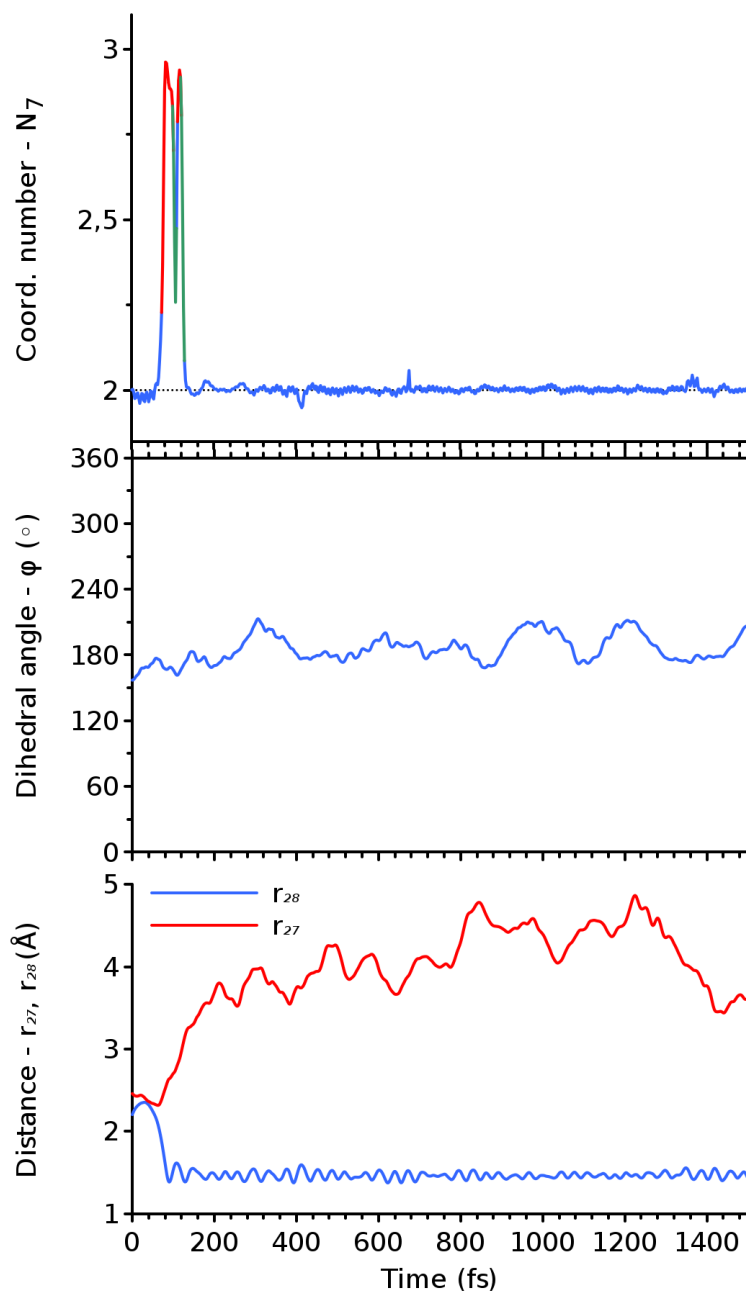

Figure S6: The change of structural variables  $N_7$  (top panel),  $\phi$  (middle panel) and  $r_{27}$  and  $r_{28}$  (bottom panel) along a backward trajectory launched from the point near the transition state obtained from the PBE/PW molecular dynamics calculations of aqueous solution. The color of  $N_7$  indicates the position of an excess proton. It is red when  $O_7$  is protonated, green when a water molecule hydrogen bonded to HDO is protonated, and blue otherwise.

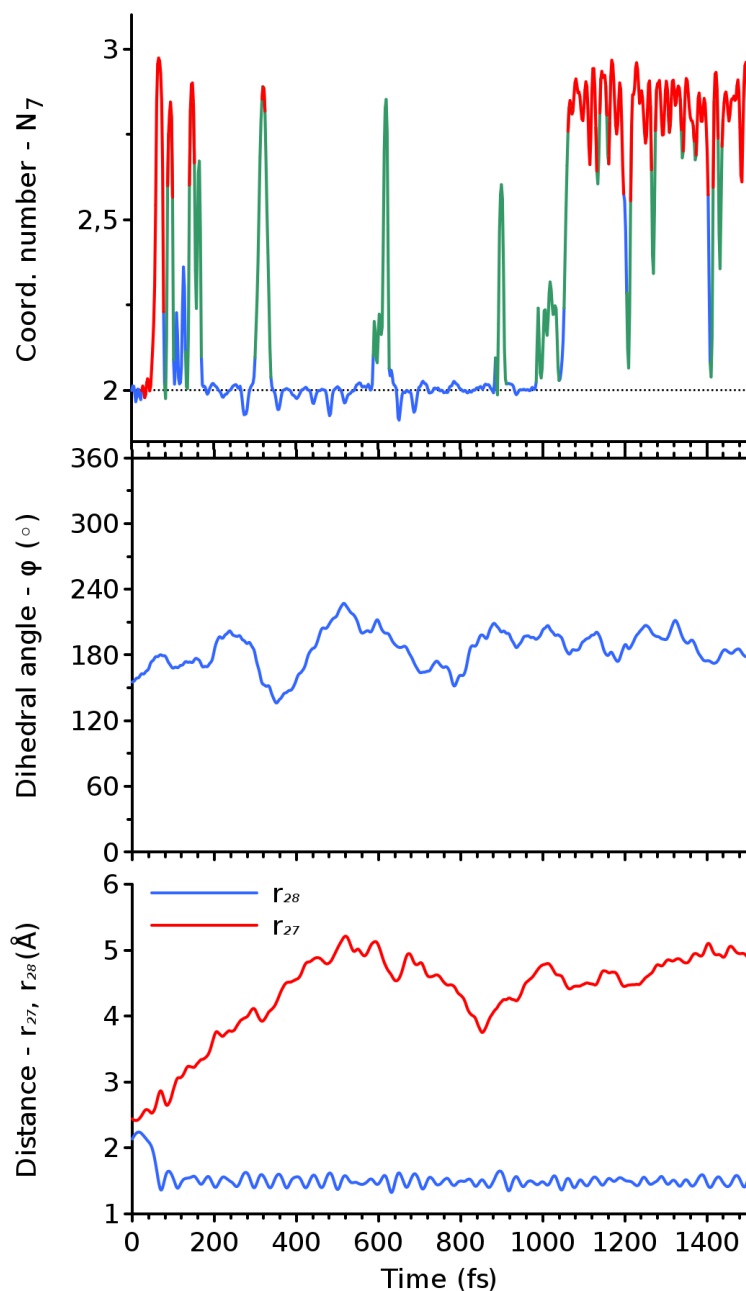

Figure S7: The change of structural variables  $N_7$  (top panel),  $\phi$  (middle panel) and  $r_{27}$  and  $r_{28}$  (bottom panel) along a backward trajectory launched from the point near the transition state obtained from the PBE/PW molecular dynamics calculations of aqueous solution. The color of  $N_7$  indicates the position of an excess proton. It is red when  $O_7$  is protonated, green when a water molecule hydrogen bonded to HDO is protonated, and blue otherwise.

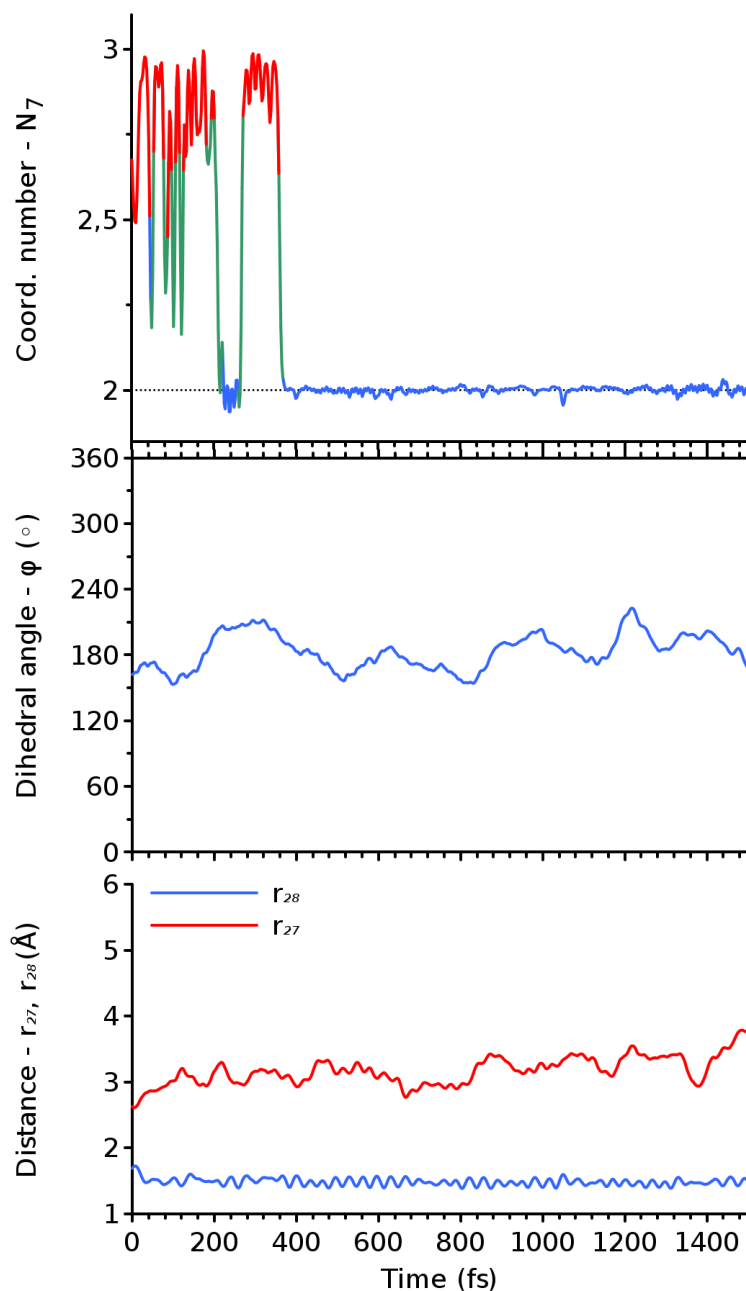

Figure S8: The change of structural variables  $N_7$  (top panel),  $\phi$  (middle panel) and  $r_{27}$  and  $r_{28}$  (bottom panel) along a backward trajectory launched from the point near the transition state obtained from the PBE/PW molecular dynamics calculations of aqueous solution. The color of  $N_7$  indicates the position of an excess proton. It is red when  $O_7$  is protonated, green when a water molecule hydrogen bonded to HDO is protonated, and blue otherwise.

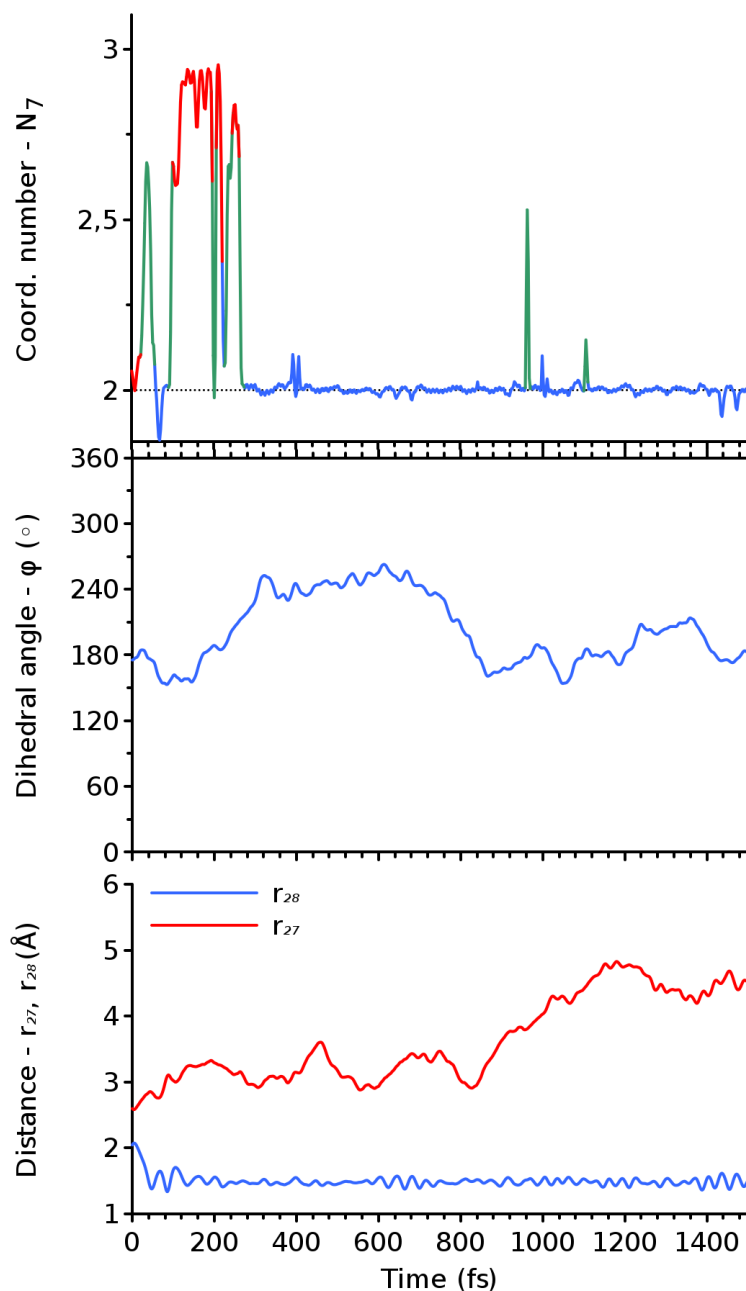

Figure S9: The change of structural variables  $N_7$  (top panel),  $\phi$  (middle panel) and  $r_{27}$  and  $r_{28}$  (bottom panel) along a backward trajectory launched from the point near the transition state obtained from the PBE/PW molecular dynamics calculations of aqueous solution. The color of  $N_7$  indicates the position of an excess proton. It is red when  $O_7$  is protonated, green when a water molecule hydrogen bonded to HDO is protonated, and blue otherwise.

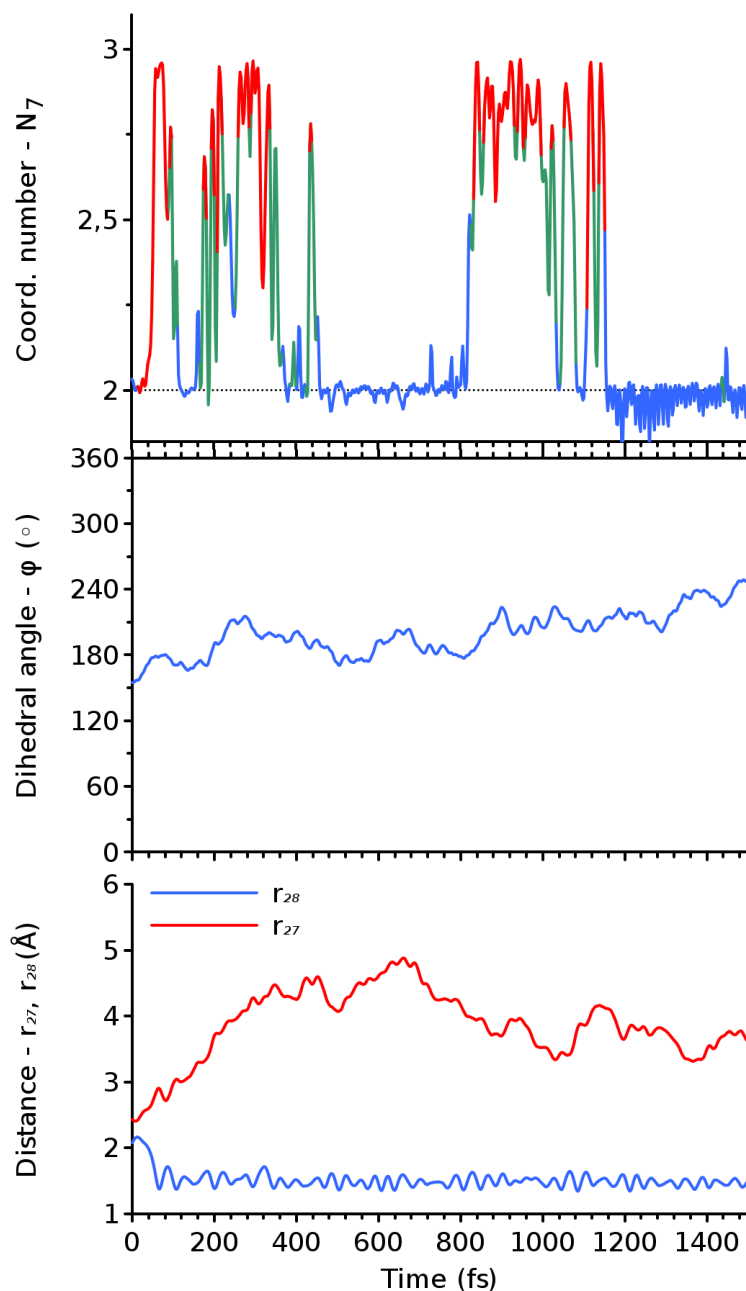

Figure S10: The change of structural variables  $N_7$  (top panel),  $\phi$  (middle panel) and  $r_{27}$  and  $r_{28}$  (bottom panel) along a backward trajectory launched from the point near the transition state obtained from the PBE/PW molecular dynamics calculations of aqueous solution. The color of  $N_7$  indicates the position of an excess proton. It is red when  $O_7$  is protonated, green when a water molecule hydrogen bonded to HDO is protonated, and blue otherwise.

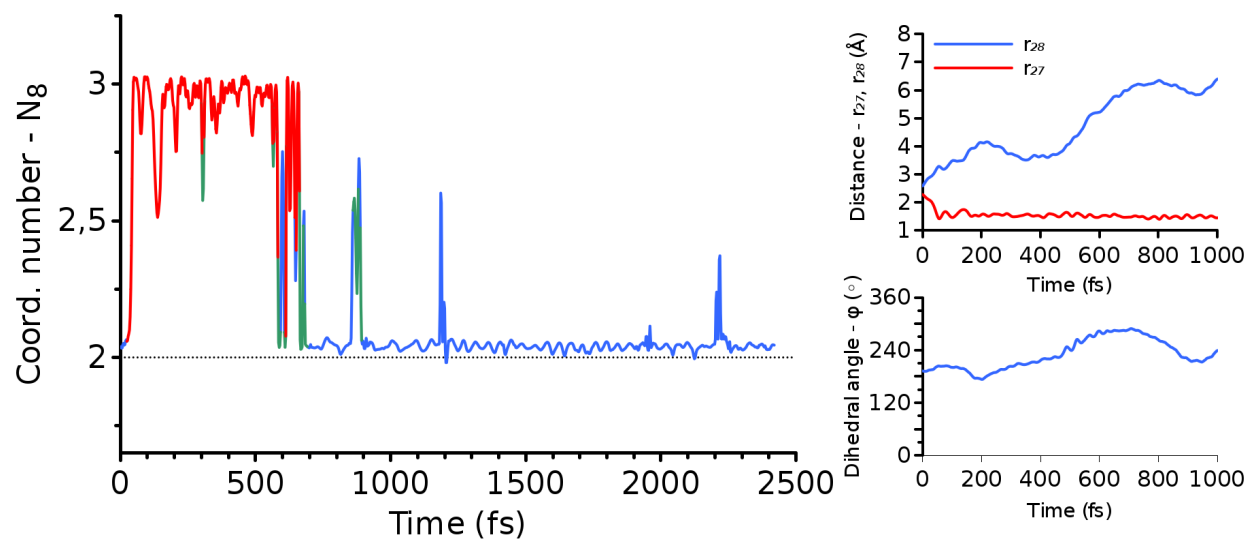

Figure S11: The change of structural variables  $N_8$  (left panel),  $r_{27}$  and  $r_{28}$  (upper right panel), and  $\phi$  (bottom right panel) along a forward trajectory launched from the point near the transition state obtained from the PBE/PW molecular dynamics calculations of aqueous solution. The color of  $N_8$  indicates the position of an excess proton. It is red when  $O_8$  is protonated, green when a water molecule hydrogen bonded to HDO is protonated, and blue otherwise.

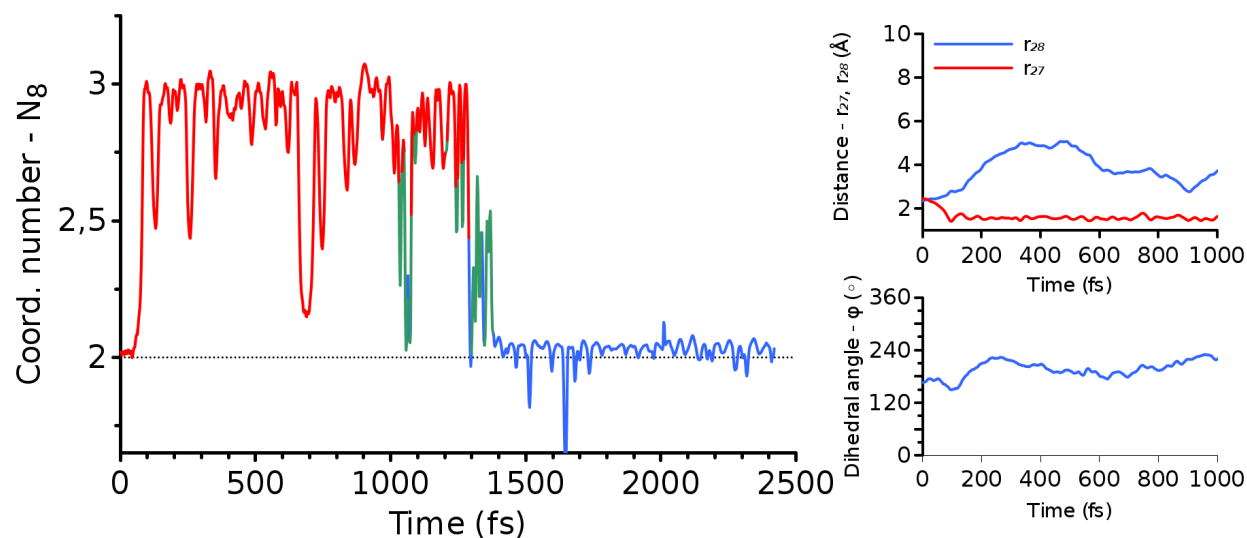

Figure S12: The change of structural variables  $N_8$  (left panel),  $r_{27}$  and  $r_{28}$  (upper right panel), and  $\phi$  (bottom right panel) along a forward trajectory launched from the point near the transition state obtained from the PBE/PW molecular dynamics calculations of aqueous solution. The color of  $N_8$  indicates the position of an excess proton. It is red when  $O_8$  is protonated, green when a water molecule hydrogen bonded to HDO is protonated, and blue otherwise.

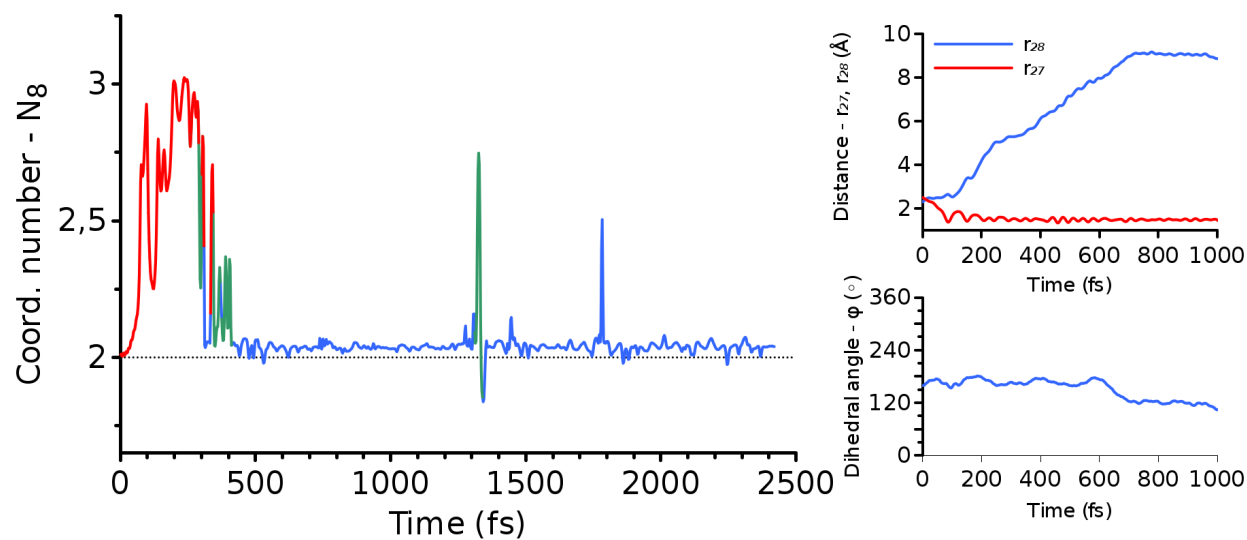

Figure S13: The change of structural variables  $N_8$  (left panel),  $r_{27}$  and  $r_{28}$  (upper right panel), and  $\phi$  (bottom right panel) along a forward trajectory launched from the point near the transition state obtained from the PBE/PW molecular dynamics calculations of aqueous solution. The color of  $N_8$  indicates the position of an excess proton. It is red when  $O_8$  is protonated, green when a water molecule hydrogen bonded to HDO is protonated, and blue otherwise.
